# Supplementary material
Source: PubMed Central journal article supplement (PMC3629845)
Supplement: NIHMS428471-supplement-1.pdf [file NIHMS428471-supplement-1.pdf]

a

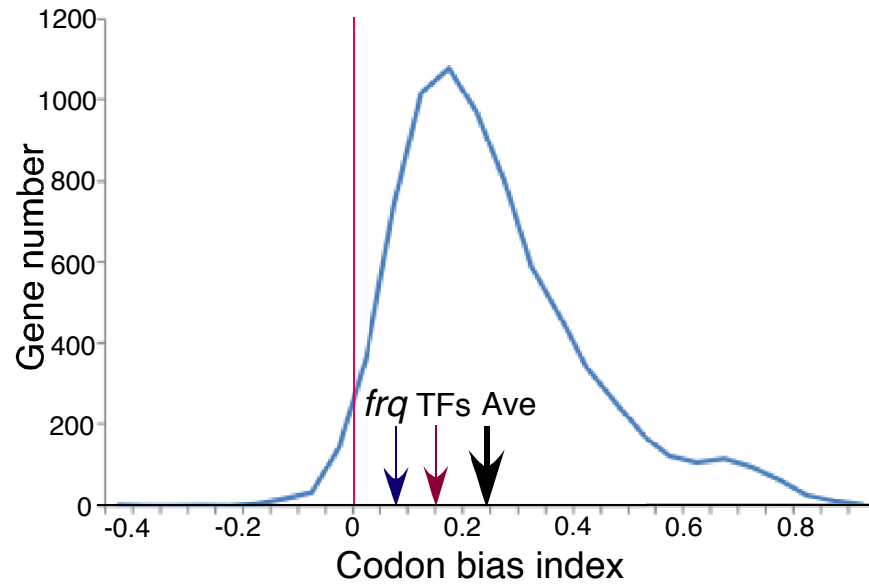

b

|                    | All genes | Top100 | <i>frq</i>  | <i>frh</i> |
|--------------------|-----------|--------|-------------|------------|
| GC                 | 56%       | 59%    | 56%         | 54%        |
| GC 3 <sup>rd</sup> | 64%       | 76%    | <b>58%</b>  | 69%        |
| Fop                | 52%       | 78%    | <b>43%</b>  | 64%        |
| CBI                | 0.24      | 0.64   | <b>0.08</b> | 0.42       |
| ENC                | 53        | 34     | <b>57</b>   | 44         |

Figure s1: (a) Distribution of *Neurospora* genes based on their CBI values. Numbers of genes within each 0.05 unit of CBI were counted. The red line indicates CBI value of 0, meaning that codon usage is random. The CBI values of average *Neurospora* genes, *frq*, and the average *Neurospora* transcription factors are indicated. (b) A table summarizing the GC content, GC content at the 3<sup>rd</sup> position of codons, Fop, CBI and ENC for all predicted *Neurospora* protein-encoding genes, genes encoding the top 100 proteins, *frq* and *frh*.

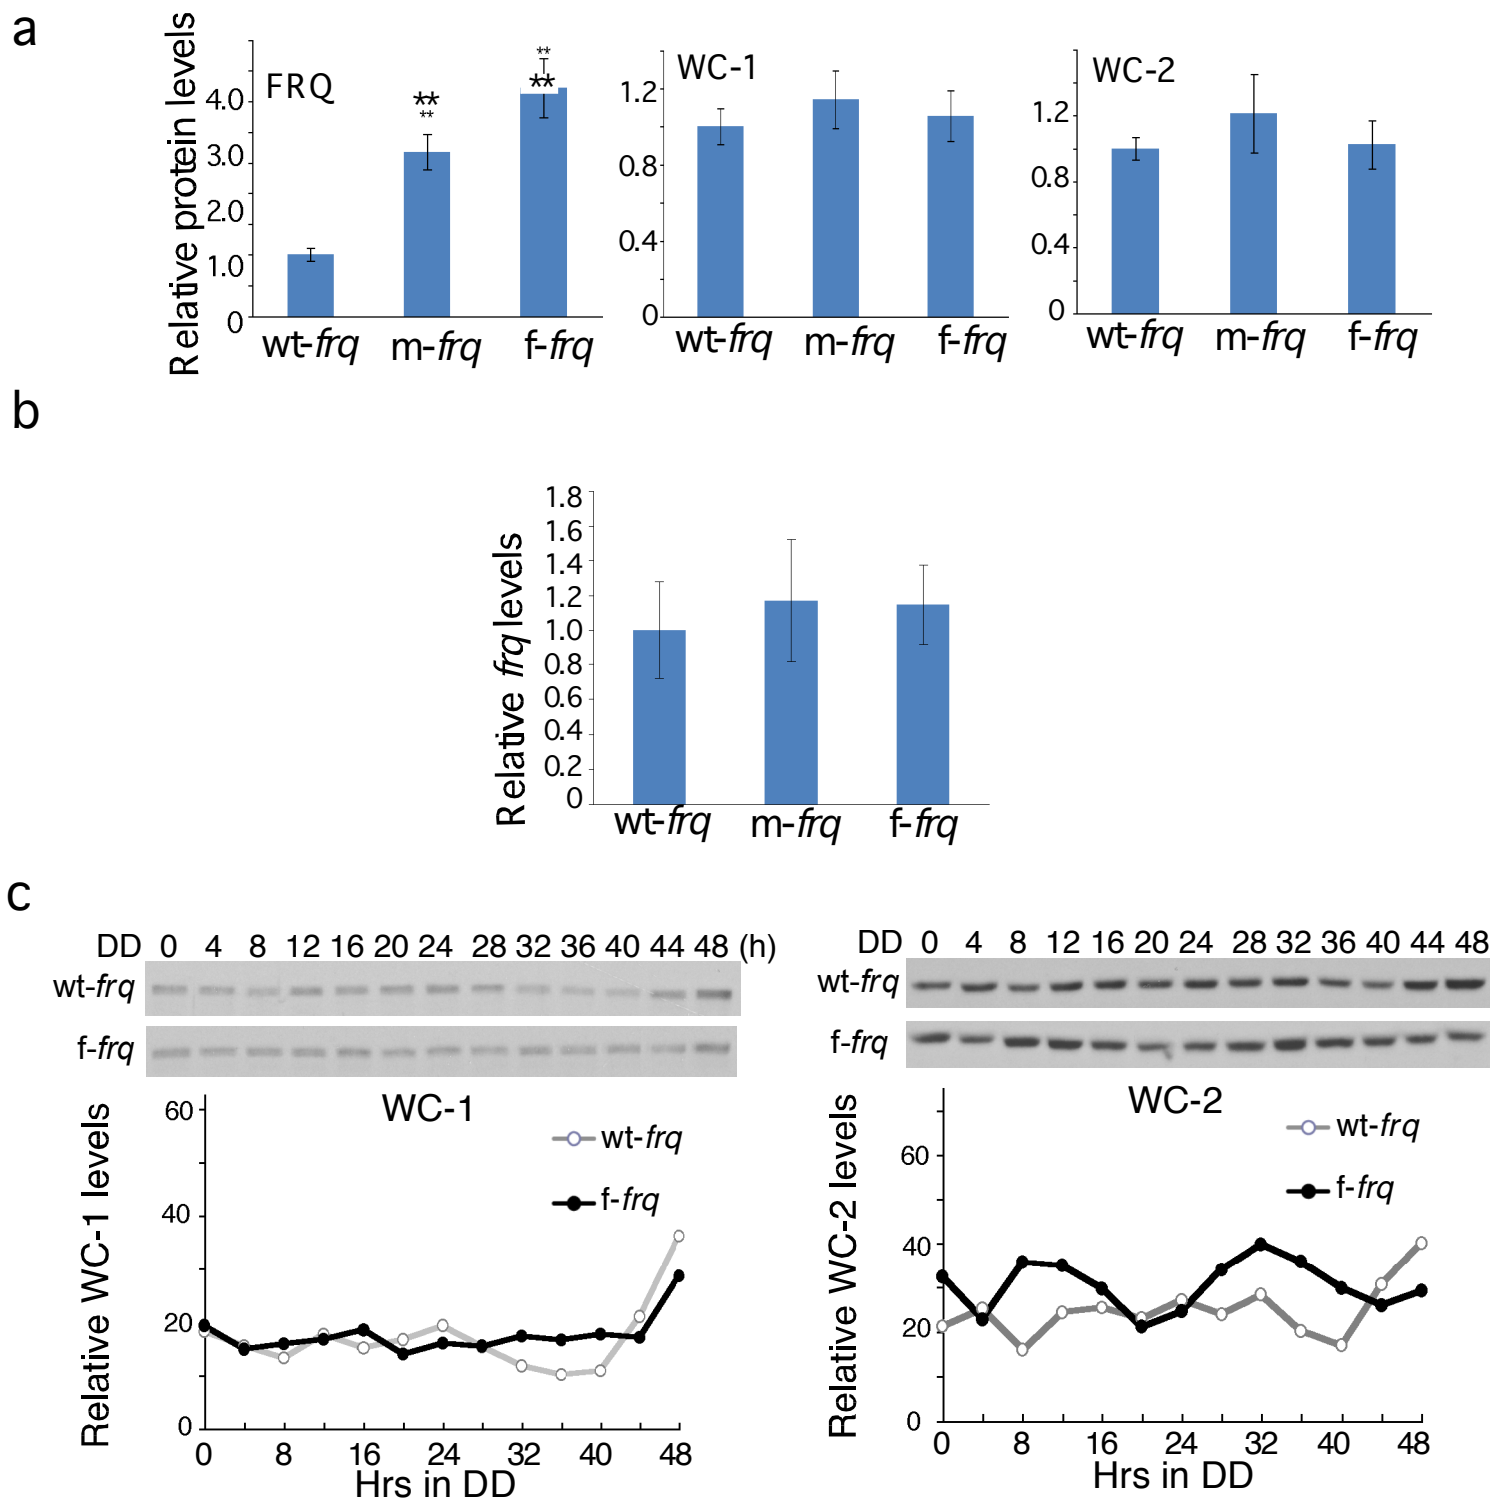

**Figure s2:** (a) Densitometric analysis of the results shown in Figure 1b. The error bars are standard deviations. n=3. The asterisks indicate p value < 0.01. (b) Quantitative RT-PCR results showing that the levels of *frq* mRNA in LL. Error bars are standard deviation. n=3. (c) Western blot analyses results showing the levels of WC-1 (left panels) and WC-2 (right panels) in the wt-*frq* and f-*frq* strains. *Neurospora* cultures were harvested in DD at the indicated time points.

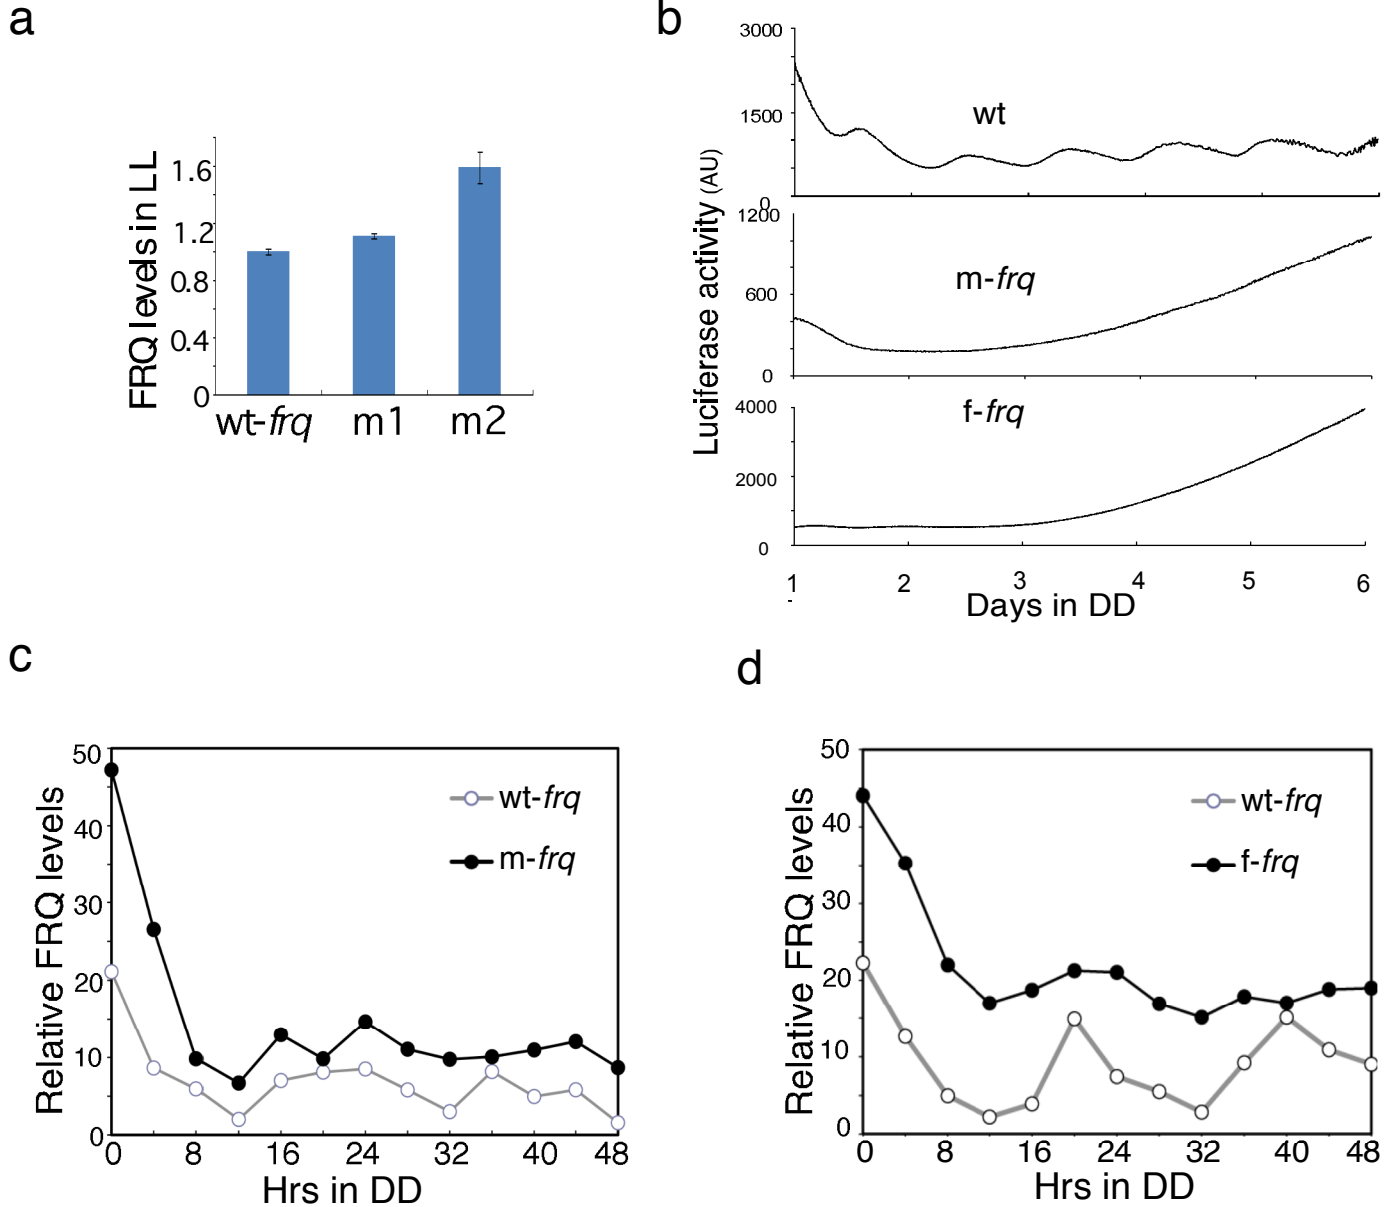

**Figure s3:** (a) Quantification of western blot results showing the levels of FRQ in the wt-*frq*, m1-*frq* and m2-*frq* strains. Error bars are standard deviation. n=3. (b) Luciferase reporter assay showing the *frq* promoter activity in the *frq10*, wt-*frq*; *frq10*, m-*frq* and *frq10*, f-*frq* strains after one day in DD. The un-normalized raw luciferase activity of the experiments in Figure 2b was shown. (c) Quantification of Western blot analyses results showing in Figure 1e. (d) Quantification of Western blot analyses results showing in Figure 1f.

a

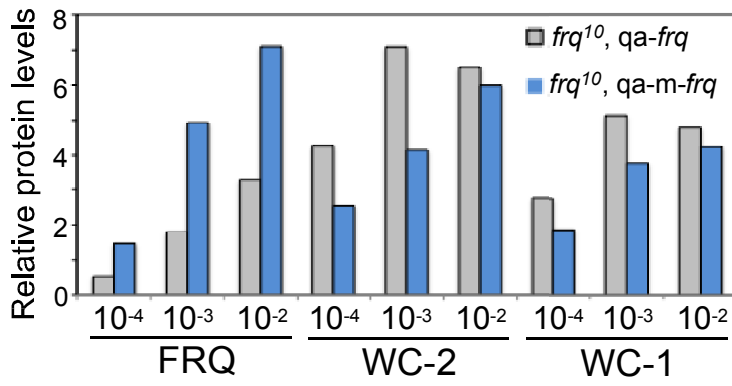

b

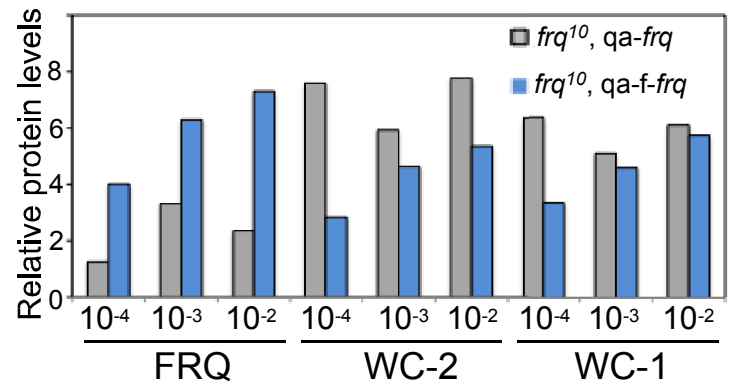

Figure s4: (a) and (b) Densitometric analyses of the results of the Western blot results shown in Figure 2b and 2c, respectively.

a

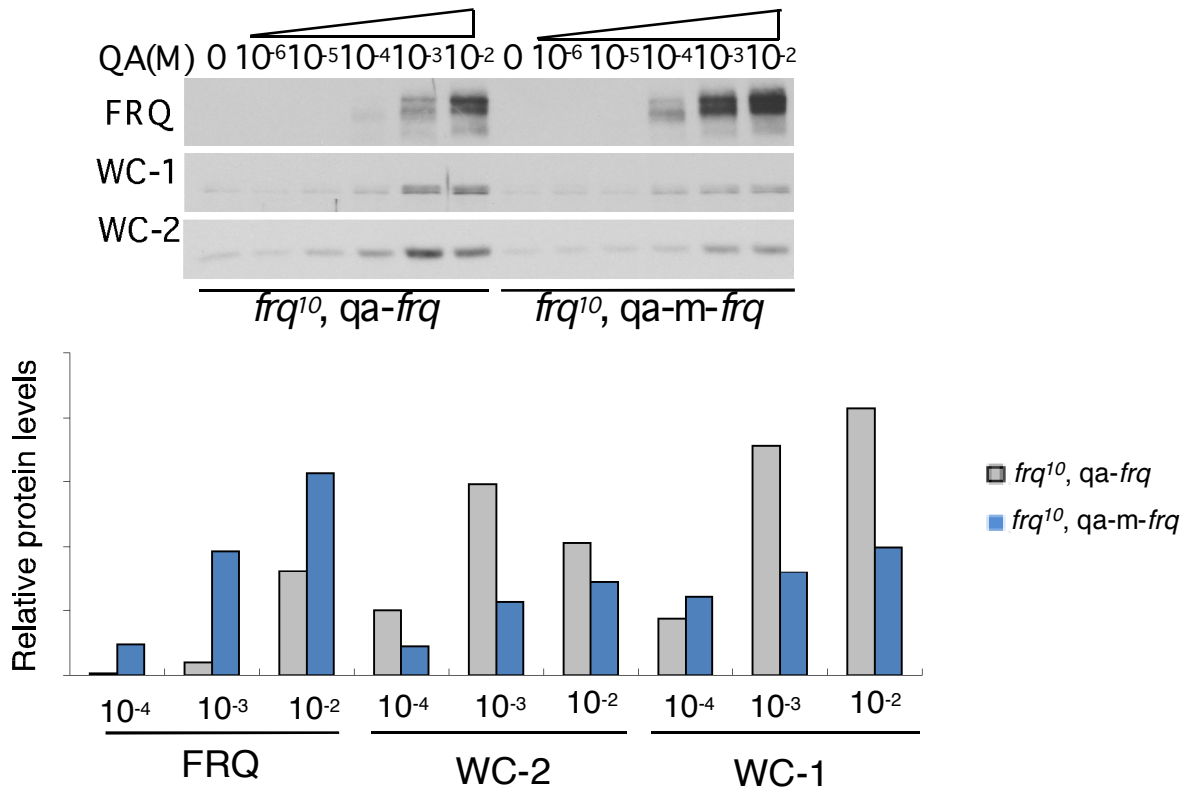

b

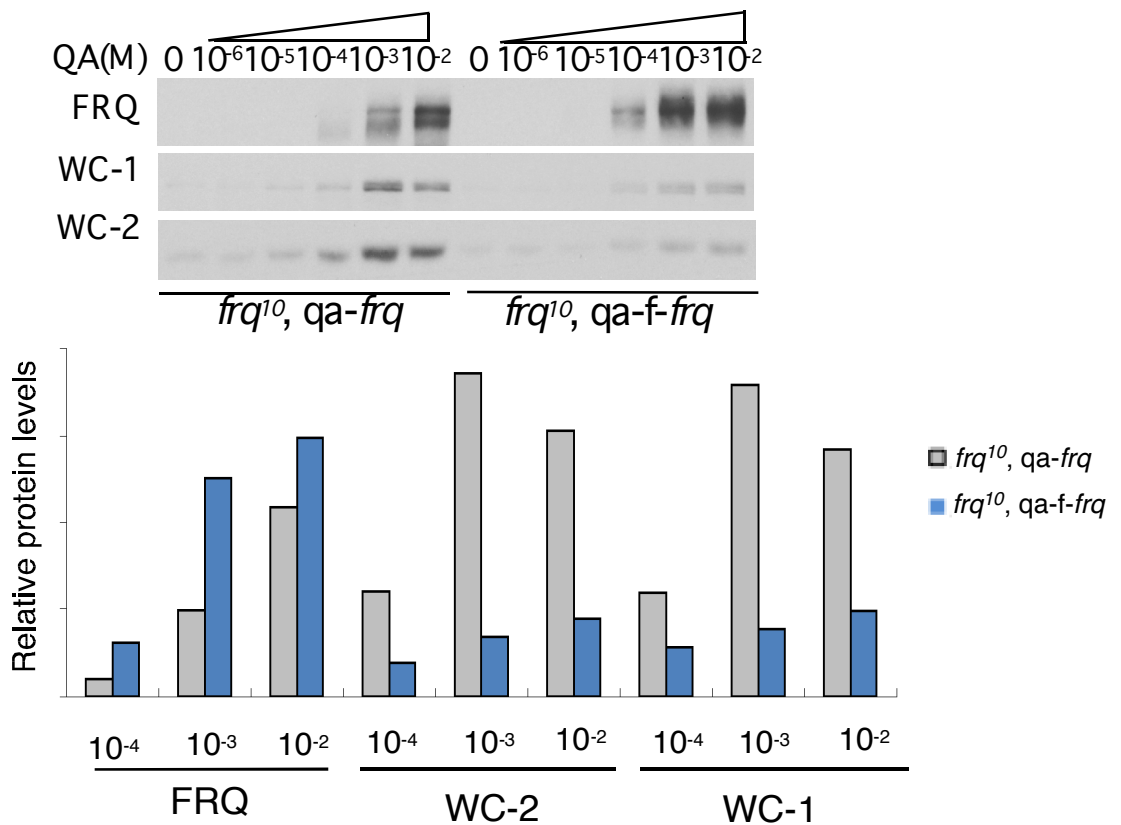

Figure s5: Western blot analysis results of independent experiments as in Figure 2b & 2c showing the levels of WC-1, WC-2, and FRQ in the indicated strains at different concentrations of QA in LL. The lower panels show the densitometric analyses of the Western blot results

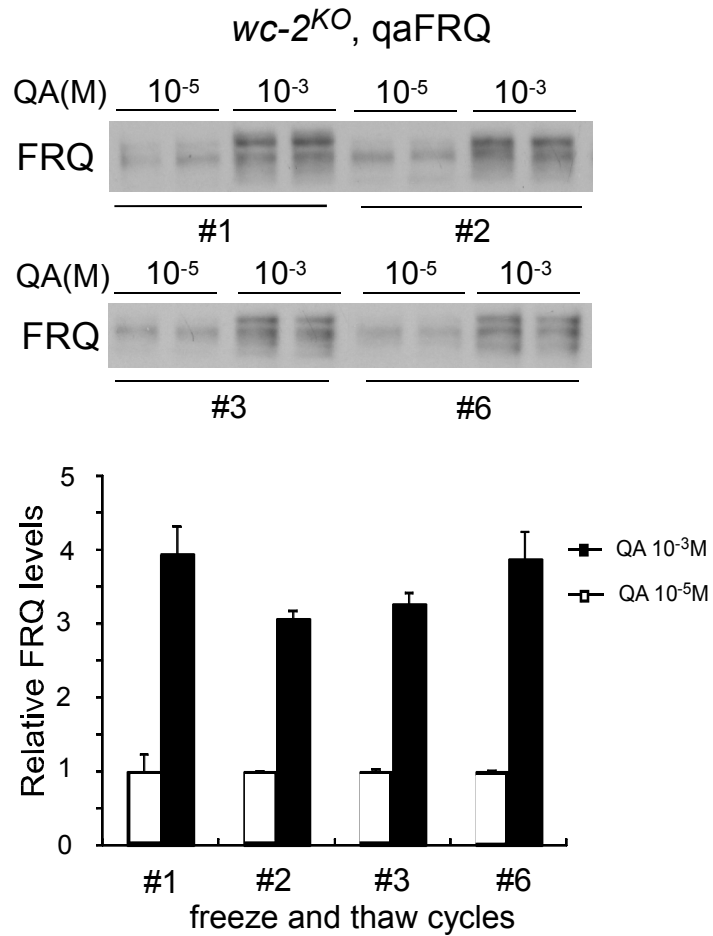

Figure s6: Overexpression of wild-type *frq* in a *wc-2<sup>KO</sup>* strain does not affect the freeze-thaw sensitivity of FRQ. *frq* expression was induced in the *wc-2<sup>KO</sup>*, qa-*frq* strain by culturing at 10<sup>-5</sup>M and 10<sup>-3</sup>M, so that FRQ levels are comparable to that of the wild-type and f-*frq* strain, respectively. Western blot analysis of FRQ was performed after the indicated number of freeze-thaw cycles. The densitometric analysis of the results was shown below.

**a**

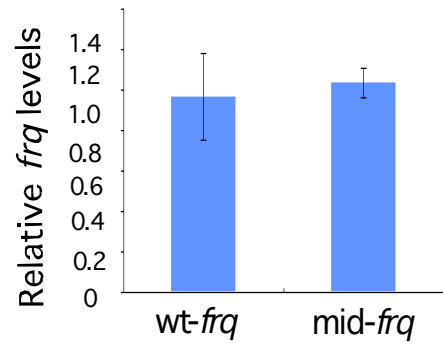

**b**

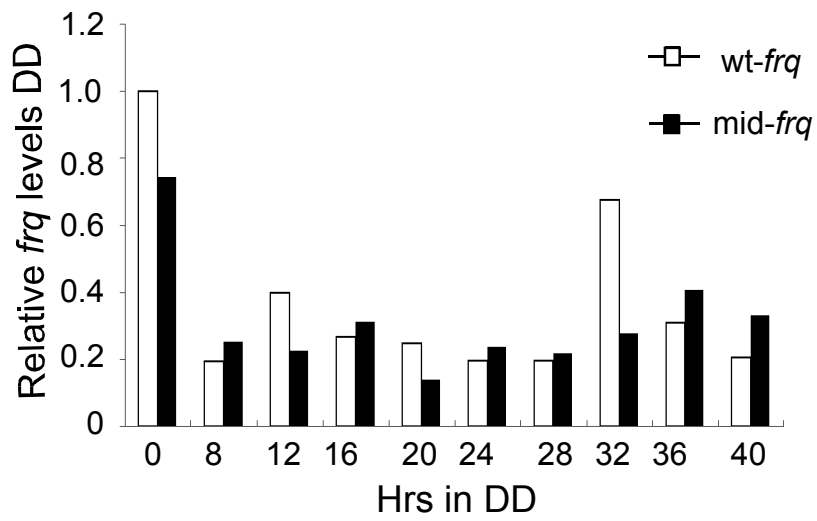

Figure s7: qRT-PCR results showing *frq* mRNA levels in LL (a) and DD (b).

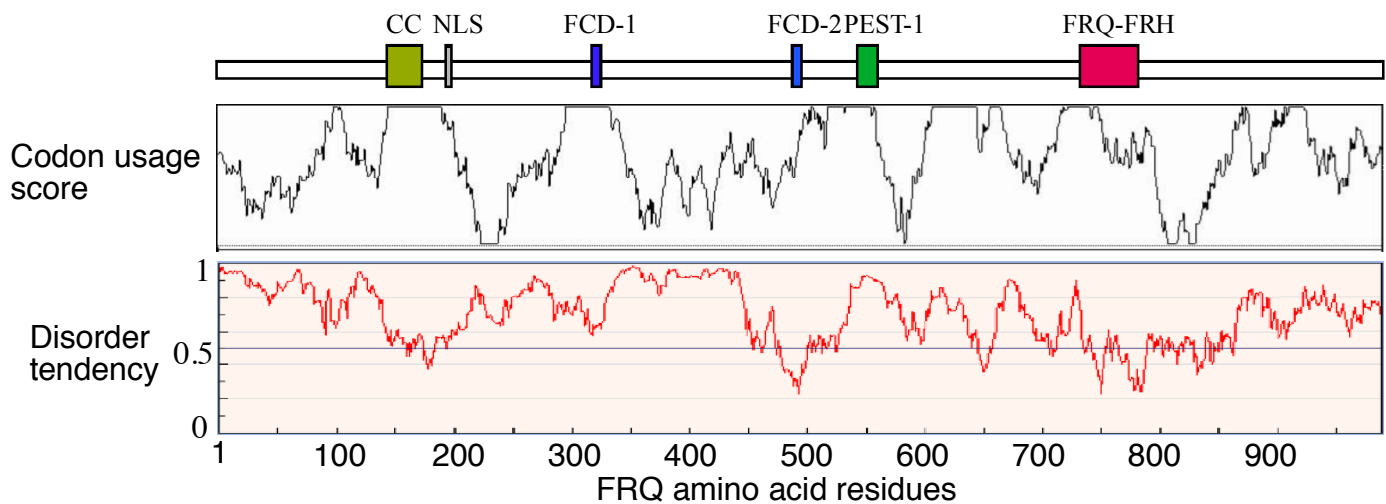

Figure s8: Plots shows the location of the previously identified FRQ domains, the *frq* codon usage score and the predicted disorder tendency of FRQ protein. Codon usage score plot was obtained using Codon Usage 3.5 (window size 35nt, and logarithmic range 3). The codon usage score is highest when codons contain the highest frequency of preferentially used codons in the genome. Protein disorder tendency was determined by IUPred (<http://iupred.enzim.hu/>). Residues with a score above 0.5 can be regarded as disordered.



### SphI

wt ATGGCGGATAGTGGGGATAAATCCCAGGGCATGCGCCACCACCCTTTGACAGCCGTGGTCACCCTCTTCCC 72  
 m-frq ATGGCGGATAGTGGGGATAAATCCCAGGGCATGCGCCCCCCGCCCTTCGACAGCCGCGGCCACCCCTCCCCC  
 f-frq ATGGCCGACTCCGGCGACAAGTCCCAGGGCATGCGCCCCCCCCCCTTCGACTCCCGCGGCCACCCCTCCCCC

wt CGACGTGCTTCCCCAGACAAATCAATAACACTTAAAAATCACCGCCTTGCCGGAGATACTAGCAGCAGAGT 143  
 m-frq CGCCGCGCTTCCCCCGACAAGTCCATCACCCTCGAGAACCACCGCCTCGCCCGCGATACCAGCAGCAGAGT  
 f-frq CGCCGCGCTTCCCCCGACAAGTCCATCACCCTCGAAAATCACCGCCTTGCCGGAGATACTAGCAGCAGAGT

wt TACTTCATCTTCCGCACTGGGAGTGACCGAATCCCAACCCCAACTCAAGAGCTCGCCACCCGAAGGAATT 214  
 m-frq CACCTCGTCCTCCGCCTGGGCGTGACCGAGTCCCAGCCCCAGCTCAAGAGCTCGCCACCCGCGAGGAACT  
 f-frq CACCTCCTCCTCCGCCTCGGCGTCACCGAGTCCCAGCCCCAGCTCAAGTCCTCCCCCACCCGCCGCAACT

wt CGTCTGGAGAGAGCGAGCCCACGAATTGGTTTTAATCAATCCAATCGTAACCCTGCCGCGGCCTTTCATGAC 285  
 m-frq CGTCCGGAGAGAGCGAGCCCACGAACTGGTTTTACCAGTCCAACCGCAACCCTGCCGCTGCCTTCCACGAC  
 f-frq CCTCCGGCGAGTCCGAGCCCACCAACTGGTTCAACCAGTCCAACCGCAACCCGCCGCGCCTTCCACGAC

wt GAGAGCCATATCATGGAAGTCGATCCTCCTTTTTATCAAAGGAGACTGACTCCTCCAACGAGGAATCCAG 356  
 m-frq GAGAGCCACATCATGGAGGTCGATCCTCCCTTCTACCGAAGGAGACCGACTCCTCCAACGAGGAGTCCCG  
 f-frq GAGTCCCACATCATGGAGGTCGACCCCCTTCTACCGAAGGAGACCGACTCCTCCAACGAGGAGTCCCG

wt GTATCCGCCTGGACGAAACCCTGTACATCCGCCCGGTGGTGTCCAGTTACCCGGGTTCGCCCCGGTTGCTG 427  
 m-frq CTACCCCCCTGGACGCAACCCTGTCCACCCGCCCGGTGGCGTCCAGCTCCCGGCTTCCGCCCGGTCGCCG  
 f-frq CTACCCCCCCGGCGCAACCCCGTCCACCCCCCCGGCGGCGTCCAGCTCCCGGCTTCCGCCCGTCGCCG

### AflII

wt CTCACAGCAGCGCCGCGATGACTACCGCAGTGTTCATGACGACTTGACTGTGAAAACAAGCGGCCTTAAG 498  
 m-frq CTCACAGCAGCGCCGCGATGACTACCGCAGCGTTCATCGACGACTTGACTCGTGCAGAAACAAGCGCCTTAAG  
 f-frq CCACTCTCCGCCGCGACGACTACCGTCCGTTCATCGACGACTCACCGTGCAGAAACAAGCGCCTTAAG

Figure s9: N-terminal nucleotide sequence comparison of the *frq* gene in the wild-type, *m-frq* and *f-frq* strains.

vt-*frq* TTGTTTGAGATCAAGGTACATGGCTTACCTAGAAGAAAGAAACGTGAGTTGGAGGCAACGCTCCGCGACTTTG 62:  
 iid-*frq* **CTCTT**CGAGATCAAGGT**CCACGGCT****CCCCCGCCG**CAAGAAG**CGCGAGCT**CGAGGCC**ACCCT**CCGCGACT**TCG**

vt-*frq* CTGCCAGTCTCGGGGACTCGAGCGAATCGACATCGCAGAGGAGAAAGACTGGCAGACATGGAACGGCCGTTCA 69:  
 iid-*frq* **CCGCTCCCT**CGG**CGACTCT**CCGAG**TCCACCTCC**AG**CGCCG**CAAGAC**CGGCCGCC**AC**CGGCAC**CGCCGT**CCA**

vt-*frq* CTCGTCTGGGGTTTCGTTGTCGAAACACGATTTCGTTCGTTCATCGTTCGCGCAGTTCGTCTGTTCGATTCTGCATAC 77:  
 iid-*frq* **CTCTCCGGCGTCTCCCTCT**CAAGCACGACT**CTCTCTCTCT**CCG**CTCCCG**CCCGT**CGACTCCGC**TAC

vt-*frq* AACTCTATGTCGACGGGCCGTAGCTCTCATGCGCCCCACTCTTCCGGTCCGTTCGCTCGGACGACCTTCGCTGA 84:  
 iid-*frq* AACT**CCATGTCCAC**CGGCC**CTCTCTCC**AC**CGCCCC**CACT**CTCCGGCCC**CT**CTCTCGG**CGCC**CTCCCT**CA

vt-*frq* CCAGGGCAAATCCGTTCGGGACCCAAAAGGTAGAAAATCTGCGCGACACGCCCGATGGCCTGCTTCCTCA 91:  
 iid-*frq* **CCCGCGCAAGT**CCGTTCGG**CACCCAG**AAGGT**CGAGAACT**CT**CCGCGACAC**CCCG**ACGGCCTCT**CCCCA

vt-*frq* CCATATTGTCATGACCGACAAGGAGAAGAAGAAGCTGGTTGTCCGACGCTTGGAGCAACTGTTACCCGGAAAG 99:  
 iid-*frq* **CCACAT**CGTCATGACCGACAAGGAGAAGAAGAAGCT**CGT**CGTCCG**CCGCT**CGAG**CACTCT**TACCCGG**CAAG**

vt-*frq* ATCAGTGGACGAAACATGCAGCGCAACCAGTTCGATGCCGAGCATGGATGCACCACTCGCGCCGGAAGGAACCA 106:  
 iid-*frq* AT**CTCCGGCCG**CAACATGCAGCGCAACCAGT**CCATGCC**CT**CCATGGAC**CGCC**CCCTCGC**CCCGAGGG**CCACCA**

vt-*frq* ACATGGCCCCCCCCTCGCCCCCTCCGGAAGGATTGCGCGAAGCTTGCATCCAACCTACAGGATGGAGACAACCC 113:  
 iid-*frq* ACATGGCCCCCCCC**CCGCCCCC**CCCGAGGG**CTCCGCGAGGC**CTGCAT**CCAGCTCC**AGGAC**CGCGACA**ACCC

vt-*frq* GCGAAAGAACCCTCCTCCAAGACAATGGTTCTGCATCCAACCTCGGGTGGCGATCAAACCGAACTTGGCGGA 120:  
 iid-*frq* **CCGCAAGA**ACC**CTCCTCCA**AGGACA**ACGGCTCCGC**CTCCAAC**CTCCGG**CGCGAC**CCAG**ACCGAG**CTCGGCGGC**

vt-*frq* ACTGGGACTGGAAGCGGAGATGGAAGTGAAGCGGCGGTTCGCACTGGTAACAACACCTCGCCCCCGGGAGCTA 128:  
 iid-*frq* **ACCGGCAC**CGG**CTCCGGCG**ACGG**CTCCGGCT**CCGGCGG**CCGCAC**CGG**CAACAAC**ACCT**CCCCCC**CGG**CGCCA**

vt-*frq* TTGCGCCGGACCAACGACCAACCAGGCCTCGCGATTTGGACCCGGACCGCGTCCAGATACCATCCGAGAATAT 135:  
 iid-*frq* **TCGCCCCG**ACCAG**CGCCCC**ACC**CGCCCC**CGCG**ACTCG**ACCC**CGACCG**CGTCCAGAT**CCCCT**CCGAGAA**CAT**

vt-*frq* GGACTACATCCGTTCATCTGGGCCTTGTATCTCCCGAATTCCTTGCAGGGAAGCCGGACCAGCTATCAAGATGTT 142:  
 iid-*frq* GGACTACATCCG**CCACCT**CGGCCT**CGTCT**CCCCGAG**TCTCC**AGGG**CTCCCG**CAC**CTCCT**ACCAGGAC**CTC**

vt-*frq* GCTCCGGATGCGGAAGGCTGGGTGTATCTCAATCTGCTTTGTAACTGGCCCAGCTGCACATGGTTAACGTAA 150:  
 iid-*frq* **GCCCCG**AC**CGCCGAG**GGCTGGGT**CTACCT**CA**ACTCTCT**G**CAACT**CGCCCAG**CTCC**ACATGGT**CAACGTCA**

vt-*frq* CGCCGAGTTTTATTCCGCAAGCTGTCTCCGAAAAGAGCACAAAGTTCAGCTGTCTGCTGATGGTTCGGAAAAT 157:  
 iid-*frq* **CCCCCT**CTT**CATCCG**CA**GGCGTCT**CCGAG**AAGTCC**AC**CAAGTTC**AGCT**CTCC**GG**CGACGG**CCG**CAAGAT**

vt-*frq* CCGCTGGCGTGGCGGA 1590  
 iid-*frq* CCGCTGGCG**CGCGGC**

Figure s10: Nucleotide sequence comparison of the *frq* gene in the wild-type and mid-*frq* strains.

Table s1: The top 100 most abundant *Neurospora* proteins identified by mass spectrometry analysis.

| Gene       | protein_description                                          | prot_hit | score | mass  | matches | coverage | prot_emPAI |
|------------|--------------------------------------------------------------|----------|-------|-------|---------|----------|------------|
| NCU07826T0 | 40S ribosomal protein S19 (150 aa)                           | 73       | 1963  | 16660 | 84      | 49.0     | 27.96      |
| NCU02744T0 | 60S ribosomal protein L9 (194 aa)                            | 52       | 2279  | 21739 | 61      | 58.5     | 22.42      |
| NCU07830T0 | cytoplasmic ribosomal protein-2 (151 aa)                     | 47       | 2574  | 15987 | 62      | 68.7     | 21.89      |
| NCU04120T0 | calmodulin A (150 aa)                                        | 141      | 1105  | 16986 | 29      | 69.1     | 21.85      |
| NCU03148T0 | nascent polypeptide-associated complex beta subunit (153 aa) | 98       | 1552  | 16556 | 34      | 54.6     | 19.71      |
| NCU01808T0 | cytochrome c (109 aa)                                        | 199      | 773   | 11806 | 36      | 42.6     | 18.10      |
| NCU00979T0 | 60S acidic ribosomal protein P2 (111 aa)                     | 39       | 2960  | 11096 | 51      | 81.8     | 16.37      |
| NCU11745T0 | hypothetical protein (72 aa)                                 | 371      | 360   | 7914  | 14      | 80.3     | 16.17      |
| NCU09345T0 | no message in thiamine-1 (343 aa)                            | 6        | 10479 | 38174 | 315     | 62.6     | 15.09      |
| NCU07914T0 | phosphoglycerate kinase (419 aa)                             | 14       | 6049  | 45029 | 168     | 62.9     | 11.14      |
| NCU04140T0 | FK506 resistant-2 (176 aa)                                   | 65       | 2069  | 19217 | 55      | 44.6     | 10.86      |
| NCU07182T0 | 40S ribosomal protein S24 (137 aa)                           | 115      | 1377  | 15553 | 39      | 50.0     | 10.69      |
| NCU09995T0 | hypothetical protein (96 aa)                                 | 131      | 1187  | 10742 | 25      | 49.5     | 10.06      |
| NCU06431T0 | 40S ribosomal protein S22 (131 aa)                           | 113      | 1392  | 14811 | 36      | 61.5     | 9.84       |
| NCU10042T0 | enolase (439 aa)                                             | 1        | 27348 | 47565 | 542     | 61.9     | 9.64       |
| NCU01528T0 | glyceraldehyde-3-phosphate dehydrogenase-1 (339 aa)          | 5        | 12266 | 36270 | 303     | 56.2     | 9.33       |
| NCU06512T0 | methionine synthase (770 aa)                                 | 3        | 14407 | 86259 | 391     | 62.9     | 9.09       |
| NCU06661T0 | 60S ribosomal protein L22 (127 aa)                           | 137      | 1133  | 14201 | 36      | 54.8     | 8.63       |
| NCU04779T0 | 60S ribosomal protein L8 (263 aa)                            | 103      | 1505  | 29349 | 45      | 45.8     | 8.59       |
| NCU00726T0 | cyclosporin-resistant-1 (224 aa)                             | 17       | 4816  | 24049 | 102     | 62.8     | 8.37       |
| NCU00294T0 | 60S ribosomal protein L10a (218 aa)                          | 87       | 1765  | 24111 | 37      | 37.8     | 8.37       |
| NCU00634T0 | ribosomal protein L14 (143 aa)                               | 156      | 973   | 15844 | 35      | 52.8     | 8.25       |
| NCU02136T0 | transaldolase (301 aa)                                       | 28       | 3913  | 32752 | 100     | 59.3     | 8.15       |
| NCU06550T0 | pyridoxine 1 (309 aa)                                        | 57       | 2209  | 32334 | 64      | 52.9     | 7.58       |
| NCU05804T0 | 60S ribosomal protein L19 (193 aa)                           | 125      | 1249  | 22334 | 40      | 48.4     | 7.51       |

|            |                                                   |     |       |       |     |      |      |
|------------|---------------------------------------------------|-----|-------|-------|-----|------|------|
| NCU03565T0 | ribosomal protein L26 (137 aa)                    | 169 | 903   | 15322 | 26  | 50.7 | 7.24 |
| NCU09602T0 | heat shock protein 70-1 (647 aa)                  | 25  | 4251  | 70510 | 122 | 53.1 | 7.04 |
| NCU04334T0 | chaperonin (105 aa)                               | 434 | 282   | 11127 | 10  | 51.9 | 6.97 |
| NCU01949T0 | 40S ribosomal protein S9 (191 aa)                 | 123 | 1266  | 21793 | 53  | 51.1 | 6.82 |
| NCU07700T0 | colonial temperature-sensitive-3 (845 aa)         | 7   | 9462  | 93203 | 285 | 56.0 | 6.70 |
| NCU00489T0 | cytoplasmic ribosomal protein-10 (263 aa)         | 132 | 1169  | 28649 | 33  | 59.2 | 6.36 |
| NCU08340T0 | ADP-ribosylation factor 1 (186 aa)                | 211 | 739   | 20966 | 25  | 63.8 | 6.30 |
| NCU06110T0 | thiazole biosynthetic enzyme (345 aa)             | 2   | 15382 | 36841 | 320 | 54.7 | 6.19 |
| NCU02274T0 | serine hydroxymethyltransferase (481 aa)          | 38  | 2966  | 52944 | 90  | 54.2 | 6.08 |
| NCU00464T0 | 60S ribosomal protein L32 (132 aa)                | 164 | 921   | 14955 | 27  | 40.5 | 6.08 |
| NCU05498T0 | hypothetical protein (181 aa)                     | 215 | 722   | 19738 | 28  | 58.9 | 6.07 |
| NCU07287T0 | hypothetical protein (227 aa)                     | 99  | 1550  | 24509 | 36  | 76.1 | 6.05 |
| NCU02181T0 | 40S ribosomal protein S4 (262 aa)                 | 97  | 1610  | 29578 | 50  | 52.9 | 5.95 |
| NCU04202T0 | nucleoside diphosphate kinase-1 (153 aa)          | 74  | 1955  | 16890 | 56  | 52.0 | 5.85 |
| NCU06226T0 | 60S ribosomal protein L25 (157 aa)                | 108 | 1445  | 17109 | 39  | 45.5 | 5.69 |
| NCU01204T0 | tropomyosin (162 aa)                              | 129 | 1207  | 18771 | 26  | 52.8 | 5.67 |
| NCU04173T0 | actin (376 aa)                                    | 51  | 2282  | 41581 | 76  | 54.7 | 5.66 |
| NCU08620T0 | 40S ribosomal protein S16 (143 aa)                | 174 | 881   | 15714 | 37  | 52.1 | 5.46 |
| NCU01452T0 | 40S ribosomal protein S1 (257 aa)                 | 116 | 1359  | 29051 | 36  | 42.2 | 5.45 |
| NCU02133T0 | superoxide dismutase (155 aa)                     | 70  | 1989  | 15875 | 47  | 55.8 | 5.38 |
| NCU06075T0 | pyruvate kinase (528 aa)                          | 20  | 4547  | 57834 | 119 | 53.7 | 5.35 |
| NCU02629T0 | bifunctional purine biosynthesis protein (595 aa) | 36  | 3094  | 64646 | 79  | 65.7 | 5.33 |
| NCU00475T0 | 40S ribosomal protein S18 (157 aa)                | 111 | 1426  | 17758 | 54  | 51.9 | 5.25 |
| NCU02252T0 | phosphoglycerate mutase (520 aa)                  | 37  | 3091  | 56782 | 79  | 47.2 | 5.21 |
| NCU06346T0 | hypothetical protein (102 aa)                     | 196 | 782   | 11057 | 18  | 64.4 | 5.15 |
| NCU05599T0 | 40S ribosomal protein S28 (69 aa)                 | 204 | 762   | 7716  | 20  | 36.8 | 5.05 |
| NCU08627T0 | cytoplasmic ribosomal protein-7 (88 aa)           | 197 | 781   | 9655  | 19  | 48.3 | 4.88 |

|            |                                                        |     |       |        |     |      |      |
|------------|--------------------------------------------------------|-----|-------|--------|-----|------|------|
| NCU03302T0 | 60S ribosomal protein L36 (105 aa)                     | 444 | 275   | 11549  | 20  | 43.3 | 4.76 |
| NCU02806T0 | 14-3-3 family protein 7 (263 aa)                       | 157 | 971   | 29311  | 29  | 50.0 | 4.74 |
| NCU07922T0 | elongation factor 3 (1057 aa)                          | 15  | 5419  | 117036 | 166 | 59.1 | 4.67 |
| NCU08963T0 | 60S ribosomal protein L30 (110 aa)                     | 146 | 1064  | 11695  | 25  | 22.0 | 4.67 |
| NCU01195T0 | amination-deficient (455 aa)                           | 10  | 7945  | 48823  | 166 | 59.9 | 4.38 |
| NCU01827T0 | 60S ribosomal protein L27 (136 aa)                     | 228 | 631   | 15713  | 28  | 41.5 | 4.36 |
| NCU06031T0 | mitochondrial peroxiredoxin PRX1 (226 aa)              | 109 | 1438  | 25097  | 35  | 51.1 | 4.33 |
| NCU04826T0 | hypothetical protein (1423 aa)                         | 30  | 3643  | 152765 | 109 | 56.0 | 4.12 |
| NCU06783T0 | ATP citrate lyase (488 aa)                             | 84  | 1792  | 52937  | 63  | 60.6 | 4.02 |
| NCU08389T0 | 60S ribosomal protein L20 (175 aa)                     | 92  | 1690  | 20330  | 41  | 40.2 | 4.01 |
| NCU07807T0 | fructose bisphosphate aldolase (363 aa)                | 11  | 7494  | 39864  | 133 | 53.9 | 3.95 |
| NCU02003T0 | translation elongation factor-1 (461 aa)               | 4   | 13798 | 49641  | 382 | 36.3 | 3.93 |
| NCU02765T0 | RNA binding protein (116 aa)                           | 298 | 478   | 12973  | 10  | 55.7 | 3.80 |
| NCU03608T0 | ketol-acid reductoisomerase (403 aa)                   | 61  | 2130  | 44596  | 53  | 49.5 | 3.79 |
| NCU03757T0 | 60S ribosomal protein L4-A (362 aa)                    | 53  | 2249  | 38790  | 59  | 44.9 | 3.78 |
| NCU07014T0 | cytoplasmic ribosomal protein-3 (147 aa)               | 133 | 1156  | 16932  | 28  | 51.4 | 3.78 |
| NCU00147T0 | ARD/ARD family protein (179 aa)                        | 331 | 421   | 20960  | 14  | 64.6 | 3.77 |
| NCU05290T0 | orotate phosphoribosyltransferase (234 aa)             | 210 | 740   | 25131  | 16  | 57.5 | 3.73 |
| NCU00413T0 | 60S ribosomal protein L2 (255 aa)                      | 152 | 987   | 27340  | 41  | 50.0 | 3.67 |
| NCU07027T0 | glycogen phosphorylase (888 aa)                        | 50  | 2304  | 100731 | 71  | 49.0 | 3.60 |
| NCU09475T0 | 40s ribosomal protein s5 (214 aa)                      | 168 | 905   | 23665  | 30  | 34.7 | 3.56 |
| NCU08287T0 | pyrABCN (1833 aa)                                      | 9   | 8580  | 202548 | 271 | 43.7 | 3.51 |
| NCU05554T0 | 60S ribosomal protein L13 (215 aa)                     | 58  | 2185  | 23862  | 47  | 45.3 | 3.50 |
| NCU07307T0 | fatty acid synthase beta subunit dehydratase (2093 aa) | 8   | 9211  | 232306 | 260 | 51.3 | 3.49 |
| NCU05238T0 | sulfite reductase beta subunit (1539 aa)               | 21  | 4495  | 168954 | 135 | 48.3 | 3.46 |

|            |                                                       |     |      |        |     |      |      |
|------------|-------------------------------------------------------|-----|------|--------|-----|------|------|
| NCU07281T0 | glucose-6-phosphate isomerase (562 aa)                | 78  | 1901 | 61360  | 52  | 48.8 | 3.45 |
| NCU09269T0 | ran-like (216 aa)                                     | 330 | 421  | 24260  | 17  | 44.7 | 3.38 |
| NCU02797T0 | UTP-glucose-1-phosphate uridylyltransferase (522 aa)  | 79  | 1866 | 58154  | 55  | 54.5 | 3.35 |
| NCU06047T0 | 40S ribosomal protein S2 (266 aa)                     | 34  | 3242 | 28739  | 68  | 47.2 | 3.33 |
| NCU03100T0 | 6-phosphogluconate dehydrogenase (493 aa)             | 80  | 1835 | 54191  | 53  | 43.3 | 3.32 |
| NCU06397T0 | profilin (134 aa)                                     | 140 | 1108 | 13954  | 27  | 66.9 | 3.32 |
| NCU09285T0 | zinc-containing alcohol dehydrogenase (347 aa)        | 119 | 1320 | 37272  | 42  | 54.0 | 3.31 |
| NCU04142T0 | heat shock protein 80 (706 aa)                        | 44  | 2663 | 80139  | 77  | 40.6 | 3.28 |
| NCU07267T0 | blue light-induced-3 (210 aa)                         | 279 | 511  | 22674  | 14  | 49.3 | 3.27 |
| NCU03988T0 | 60S ribosomal protein L18 (184 aa)                    | 134 | 1155 | 20590  | 34  | 39.3 | 3.26 |
| NCU03102T0 | 40S ribosomal protein S11 (162 aa)                    | 192 | 791  | 18417  | 22  | 34.2 | 3.25 |
| NCU02505T0 | succinate (1193 aa)                                   | 19  | 4655 | 130901 | 133 | 45.1 | 3.20 |
| NCU03806T0 | ribosomal protein L27a.e (150 aa)                     | 147 | 1059 | 16587  | 32  | 47.0 | 3.16 |
| NCU02193T0 | cellular filament polypeptide (571 aa)                | 13  | 6127 | 62223  | 171 | 45.6 | 3.15 |
| NCU04331T0 | cytoplasmic ribosomal protein-4 (302 aa)              | 95  | 1658 | 34391  | 40  | 46.2 | 3.08 |
| NCU06464T0 | hypothetical protein (171 aa)                         | 304 | 472  | 19015  | 19  | 42.4 | 3.08 |
| NCU07308T0 | fatty acid synthase alpha subunit reductase (1865 aa) | 12  | 7225 | 204804 | 223 | 42.8 | 3.06 |
| NCU02905T0 | 60S ribosomal protein L23 (140 aa)                    | 96  | 1612 | 14690  | 25  | 25.2 | 3.06 |
| NCU03826T0 | elongation factor 1-gamma (409 aa)                    | 104 | 1504 | 45712  | 54  | 47.8 | 3.04 |
| NCU05488T0 | RNA-binding protein Vip1 (284 aa)                     | 193 | 789  | 30304  | 23  | 64.3 | 3.03 |
| NCU02595T0 | hypothetical protein (136 aa)                         | 284 | 504  | 14767  | 12  | 48.1 | 3.02 |
| NCU02948T0 | non-anchored cell wall protein-4 (206 aa)             | 249 | 586  | 21537  | 14  | 68.3 | 2.99 |
| NCU11181T0 | Ras superfamily GTPase (190 aa)                       | 413 | 310  | 21569  | 10  | 44.4 | 2.99 |

Table s2: *Neurospora* codon usage frequencies and the predicted translation elongation rate based on tRNA copy numbers and anticodon-codon interaction.

|            |            | Observed codon frequency | Elongation rate (au) |            |            | Observed codon frequency | Elongation rate (au) |
|------------|------------|--------------------------|----------------------|------------|------------|--------------------------|----------------------|
| aa         | codon      | <i>N.crassa</i>          |                      | aa         | codon      | <i>N.crassa</i>          |                      |
| Phe        | UUU        | 0.348                    | 0.333                | Glu        | GAA        | 0.344                    | 0.222                |
|            | <b>UUC</b> | <b>0.652</b>             | <b>1</b>             |            | <b>GAG</b> | <b>0.656</b>             | <b>0.852</b>         |
| Leu        | UUA        | 0.033                    | 0.065                | Ser        | UCU        | 0.146                    | 0.172                |
|            | UUG        | 0.180                    | 0.183                |            | <b>UCC</b> | <b>0.245</b>             | <b>0.517</b>         |
|            | CUU        | 0.171                    | 0.172                |            | UCA        | 0.113                    | 0.299                |
|            | <b>CUC</b> | <b>0.323</b>             | <b>0.516</b>         |            | UCG        | 0.177                    | 0.184                |
|            | CUA        | 0.072                    | 0.269                |            | AGU        | 0.106                    | 0.069                |
|            | CUG        | 0.221                    | 0.194                |            | AGC        | 0.213                    | 0.207                |
| Ile        | AUU        | 0.314                    | 0.3                  |            | Pro        | CCU                      | 0.234                |
|            | <b>AUC</b> | <b>0.594</b>             | <b>0.9</b>           | <b>CCC</b> |            | <b>0.347</b>             | <b>0.579</b>         |
|            | AUA        | 0.092                    | 0.383                | CCA        |            | 0.192                    | 0.404                |
| Met        | AUG        | 1                        | 1                    | CCG        |            | 0.226                    | 0.281                |
|            | Val        | GUU                      | 0.232                | 0.244      | Thr        | ACU                      | 0.186                |
| <b>GUC</b> |            | <b>0.417</b>             | <b>0.731</b>         | <b>ACC</b> |            | <b>0.411</b>             | <b>0.619</b>         |
| GUA        |            | 0.091                    | 0.359                | ACA        |            | 0.178                    | 0.381                |
| GUG        |            | 0.261                    | 0.192                | ACG        |            | 0.225                    | 0.254                |
| Tyr        | UAU        | 0.327                    | 0.333                | Ala        | GCU        | 0.243                    | 0.226                |
|            | <b>UAC</b> | <b>0.673</b>             | <b>1</b>             |            | <b>GCC</b> | <b>0.414</b>             | <b>0.679</b>         |
| Stop       | UAA        | 0.316                    |                      |            | GCA        | 0.145                    | 0.405                |
|            | UAG        | 0.263                    |                      |            | GCG        | 0.199                    | 0.202                |
|            | UGA        | 0.421                    |                      | Cys        | UGU        | 0.306                    | 0.333                |
| Trp        | UGG        | 1                        | 1                    |            | <b>UGC</b> | <b>0.694</b>             | <b>1</b>             |
|            | His        | CAU                      | 0.391                | 0.333      | Arg        | CGU                      | 0.144                |
| <b>CAC</b> |            | <b>0.609</b>             | <b>1</b>             | <b>CGC</b> |            | <b>0.285</b>             | <b>0.629</b>         |
| Gln        | CAA        | 0.395                    | 0.267                | CGA        |            | 0.115                    | 0.267                |
|            | <b>CAG</b> | <b>0.605</b>             | <b>0.822</b>         | CGG        |            | 0.138                    | 0.105                |
| Asn        | AAU        | 0.276                    | 0.333                | AGA        |            | 0.128                    | 0.171                |
|            | <b>AAC</b> | <b>0.724</b>             | <b>1</b>             | AGG        |            | 0.191                    | 0.114                |
| Lys        | AAA        | 0.225                    | 0.111                | Gly        | GGU        | 0.255                    | 0.241                |
|            | <b>AAG</b> | <b>0.775</b>             | <b>0.926</b>         |            | <b>GGC</b> | <b>0.404</b>             | <b>0.722</b>         |
| Asp        | GAU        | 0.425                    | 0.333                |            | GGA        | 0.189                    | 0.139                |
|            | <b>GAC</b> | <b>0.575</b>             | <b>1</b>             | GGG        | 0.152      | 0.185                    |                      |

Table s3: Predicted free energy values ( $\Delta G$ (kcal/mol)) of *frq* mRNA using mfold.

|             | <i>wt-frq</i> | <i>m-frq</i> | <i>f-frq</i> | <i>m1-frq</i> | <i>m2-frq</i> | <i>mid-frq</i> |
|-------------|---------------|--------------|--------------|---------------|---------------|----------------|
| 1-30 nt     | -7.10         | -7.10        | -8.20        | -7.10         | -7.10         | -7.10          |
| 1-800 nt    | -274.90       | -292.50      | -272.80      | -285.30       | -275.80       | -264.70        |
| 553-1590 nt | -374.60       |              |              |               |               | -339.60        |
| full length | -1135.40      | -1160.10     | -1148.00     | -1136.30      | -1142.10      | -1130.00       |
